# Supplementary material
Source: publisher figshare collection journal article supplement (https://brill.figshare.com/ndownloader/files/14478986)
Supplement: Supplementary file 1 [file 14478986]

Lecture 8

**A new view of metaphorical creativity II.**

***The effect of the immediate cultural context on metaphor use***

(11) “Arnold Schwarzenegger is not the second Jesse Ventura or the second Ronald Reagan, but the first Arnold Schwarzenegger,” said Bill Whalen, a Hoover Institution scholar who worked with Schwarzenegger on his successful ballot initiative last year and supports the actor’s campaign for governor.

“He’s a unique commodity – unless there happens to be a whole sea of immigrant body builders who are coming here to run for office. This is ‘Rise of the Machine,’ not ‘Attack of the Clones.’” (*San Francisco Chronicle*, A16, August 17, 2003)

*He’s a unique commodity* and particularly *This is ‘Rise of the Machine,’ not ‘Attack of the Clones.’* people are commodities.

Bill Whalen. Why does he use the second?

First, because Arnold Schwarzenegger played in the first of these movies. - knowledge that the conceptualizer (Whalen) has about the topic of the discourse (Schwarzenegger). Second, because these are movies that, at the time of speaking (i.e., 2003), everyone knew about in California and the US. - part and parcel of the immediate cultural context.

*The cultural context in poetry*

*Medusa*:

My mind winds to you
Old barnacled umbilicus, Atlantic cable,
Keeping itself, it seems, in a state of miraculous repair.

(retrieved from http://www.americanpoems.com/poets/sylviaplath/1412)

*umbilicus* and *Atlantic* telephone *cable*. personal relationships are physical connections.

*Atlantic cable* derives from the surrounding physical-cultural environment. The first transatlantic telephone cable system between Great-Britain and North-America was laid in the 1950s.

*Prayers of Steel*, by Carl Sandburg.

(13) LAY me on an anvil, O God.

Beat me and hammer me into a crowbar.

Let me pry loose old walls.

Let me lift and loosen old foundations.

(retrieved from http://www.bartleby.com/134/39.html)

The making of an “old type of man” into a “new type of man” is conceptualized on the analogy of God’s creation of man in the Bible.

*Skyscraper*:

(14) BY day the skyscraper looms in the smoke and sun and
     has a soul.
Prairie and valley, streets of the city, pour people into
     it and they mingle among its twenty floors and are
     poured out again back to the streets, prairies and
     valleys.
It is the men and women, boys and girls so poured in and
     out all day that give the building a soul of dreams
     and thoughts and memories.
(Dumped in the sea or fixed in a desert, who would care
     for the building or speak its name or ask a policeman
     the way to it?)

(retrieved from http://www.bartleby.com/165/55.html)

The poem was written in 1916 in Chicago. Due to its perceptual and cultural salience, it became, for Sandburg and many others, a symbol of America.

skyscraper for america. a characteristic property for the place that it characterizes.

***The effect of the immediate social setting on metaphor use***

The rock ‘n’ roll pioneer rebuilds his life—and on the new album ‘Goin’ Home,’ his timeless music. (*USA TODAY*, 2007, September 21, Section 6B)

“*rebuilds* his life”

life is a building

There are potentially other conceptual metaphors (and corresponding metaphorical expressions) that could also be used to achieve a comparable semantic effect: life is a journey and the life is a machine conceptual metaphors.

at the time of the interview, Domino was also in the process of rebuilding his house that was destroyed by the hurricane in 2005.

the social situation (rebuilding his house) triggered, or facilitated, the choice of the conceptual metaphor life is a building.

More generally: if the actual social setting involves an element that is an instance of an appropriate source domain, speakers are likely to use that source domain.

*The social context in poetry*

Lay me on an anvil, O God.

Beat me and hammer me into a steel spike.

Drive me into the girders that hold a skyscraper together.

Take red-hot rivets and fasten me into the central girders.

Let me be the great nail holding a skyscraper through blue nights into white stars.

(retrieved from http://www.bartleby.com/134/39.html)

the construction of new social structure is the physical making of new tools and building ingredients. it is the characteristically social situation of tool making and using that tool to make something else in the American context that inspires the analogy used by the poet.

*The interaction of context-induced and conventional conceptual metaphors*

skyscraper for america.

the construction of new social structure is the physical making of new tools and building ingredients.

societies are buildings.

complex systems are complex physical objects (Kövecses, 2010).

societies are buildings

the builders  the persons creating society

the process of building  the process of creating society

the foundations of the building  the basic principles on which society is based

the building materials  the ideas used to create society

the physical structure of the building  the social organization of the ideas

the building  the society

complex image (a blend) with several changes in the basic metaphor: the building becomes a skyscraper, the builder becomes a God/ blacksmith/ poet/ worker, and the building material and tools become the poet.

***The effect of the immediate linguistic context on metaphor use***

When the Electoral Commission came to make its choice between referring the case to the police and taking no action it was this defence, described by an authoritative source as showing “contempt” for the law, which helped to tilt the balance – and Mr Hain – over the edge. (*The Times* Friday January 25, 2008, News 7)

*tilt the balance* and [*tilt*] *Mr Hain over the edge*.

We keep it in memory and since it fits, we can supply it again.

uncertainty is balance (of the scales) (and certainty is lack of balance (of the scales).

*tilt someone over the edge*, is much less conventional than the first. Why does the word *tilt* get selected in the discourse?

loss of rational/ moral control is loss of physical control, such as physical fall (into a (deep) hole).

“to cause someone to fall down (into a hole),” including *push, drive, force, jolt, nudge, poke, prod, propel, shove, press, butt*, and so on. - the most conventional ones are certainly *push* and *drive*; idiom *push/drive someone over the edge*.

*Tilt*: phonetic shape of an expression in discourse can function as an elicitor of a metaphorically used expression in the same discourse, provided that the condition of fitting the required conceptual metaphor is also met.

*The effect of the immediate linguistic context in poetry*

*Medusa*: the poet is trying to escape from the harmful influence of her mother. ( “Did I escape, I wonder?”).

to convey this: the other sense of *medusa*: the “jellyfish” sense (“Your stooges / Plying their wild cells in my keel's shadow”).

It can be suggested that the “jellyfish” meaning of *medusa* is used by the poet because the mythological Medusa was introduced early on in the poem (in the title). The word form *medusa* evokes all the knowledge structures associated with it (given as the two senses of the word).

**The combined effect of factors on metaphor use**

***The combined effect of contextual factors on the use of metaphors in everyday language***

Dolgozatom a gondolkodási időben született.
Célkitűzése a törvény várható hatásainak elemzése.
Módszereiben az orvosi gondolkodást követi.
A magyar egészségügyet képzeli a beteg helyzetébe.
Kezelőorvosnak a kormányt tekinti, és konzulensként a szakértőket, illetve a
szerzőt magát kéri fel.
A prognózis meghatározás feltételének tekinti a helyes diagnózist.
Végül röviden megvizsgálja van-e alternatív kezelési lehetőség.

(retrieved from <http://mkdsz.hu/content/view/8480/207/>, February 2, 2008)

Here’s an almost literal translation of the text into English:

This paper was born in the period when people think about the issue.

Its objective is to analyze the expected effects of the law.

In its methods, it follows the way doctors think.

It imagines Hungarian health care as the patient.

It takes the government as the attending physician, and invites experts and the author [of the article] himself to be the consultants.

It considers the correct diagnosis to be the precondition for predicting the prognosis.

Finally it briefly examines if there is an alternative possibility for treatment.

knowledge about the speaker/ conceptualizer;

personal concerns, or interests;

topic of the discourse.

*The combined effect of factors in poetry*

LAY me on an anvil, O God.

Beat me and hammer me into a crowbar.

Let me pry loose old walls.

Let me lift and loosen old foundations.

Lay me on an anvil, O God.

Beat me and hammer me into a steel spike.

Drive me into the girders that hold a skyscraper together.

Take red-hot rivets and fasten me into the central girders.

Let me be the great nail holding a skyscraper through blue nights into white stars.

(retrieved from http://www.bartleby.com/134/39.html)

The religious belief system (from the cultural context)

model of work (from the social context)

knowledge the speaker-poet has about himself or herself: personal history. his father was a blacksmith.

image of the blacksmith overrides the image of God making man: the man-object is created by God as a blacksmith. complex case of conceptual integration, or blending, as proposed by Fauconnier and Turner (2002).

*motivation* for the particular input frames participating in the blend clear.

**What are the sources of metaphorical creativity?**

How does the characterization of “standard” conceptual metaphor theory change in light of the work reported in this paper?

Grady’s (1999) classification, either resemblance or correlation-based cases.

Context-induced metaphors.


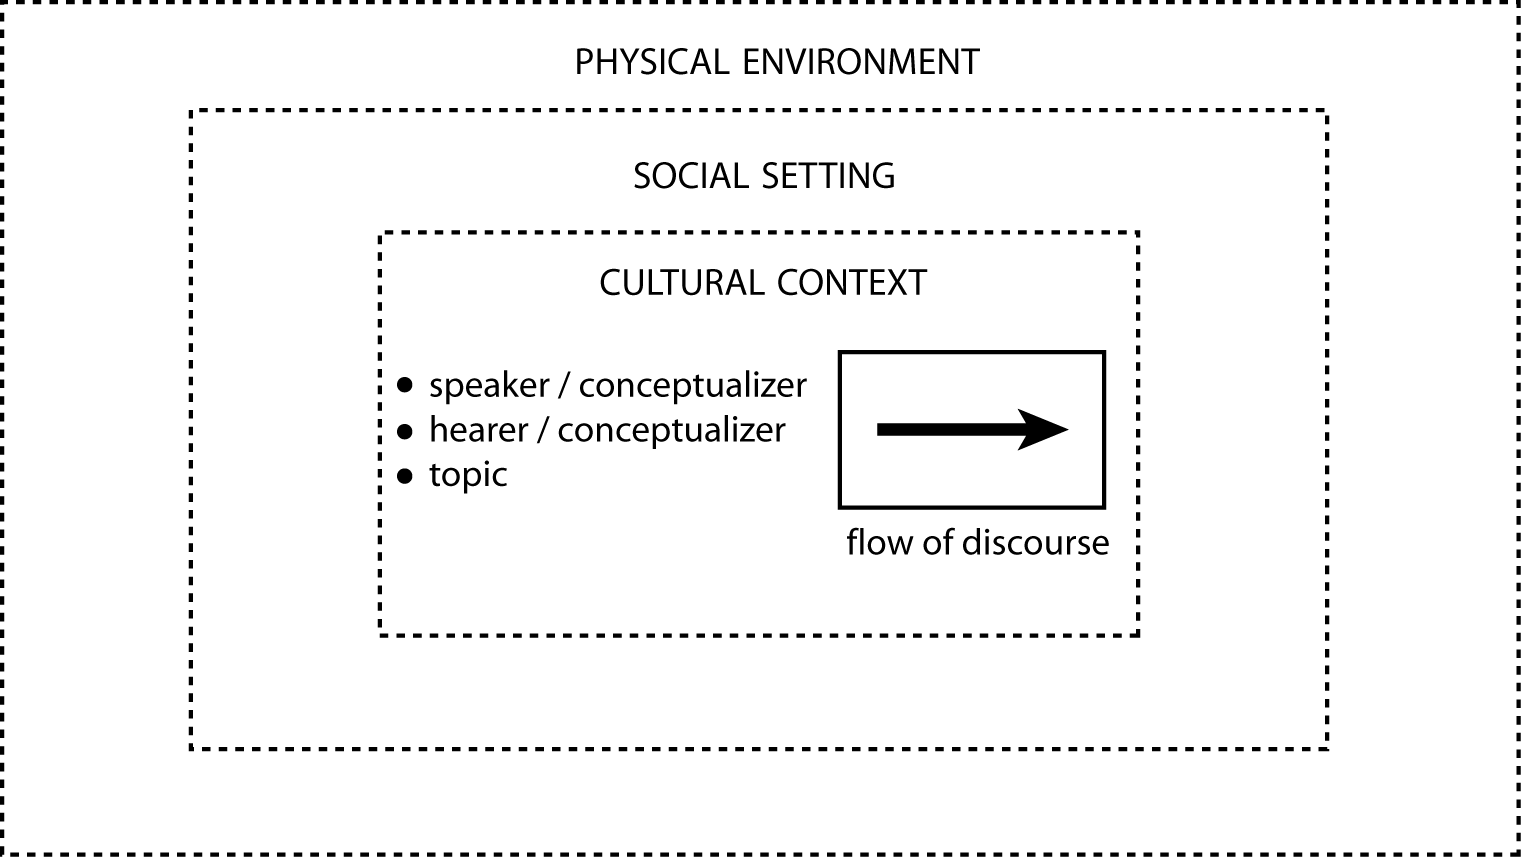


The core idea is that we try to be coherent with most of the factors that regulate the conceptualization of the world.

body on which “correlational” metaphors are based.

context in which metaphorical conceptualization takes place.

**6. Conclusions**

Cases of metaphorical creativity (source, target, context)

Context

(a) the immediate linguistic context,

(b) the knowledge conceptualizers have about themselves and the topic,

(c) the immediate cultural context,

(d) the immediate social context, and

(e) the immediate physical setting.

“context-induced metaphors”

hermeneutical-postmodernist perspective

social-cultural-personal background

context-induced metaphors can be seen as both resulting from the social-cultural-personal background and lending coherent meaning structures to particular poems.

Our felt sense of the difference (in addition to many other things, such as formal properties of poetry) derives in part from the *density* and *complexity* of context-induced and bodily-based metaphors we find in poetry.

embodied cognition. embodied cognition may be based on a variety of different experiences in metaphorical conceptualization, including universal experiences, but also social, cultural, etc. experiences, and, importantly, unique personal ones.

**References**

Aitchison, Jean. 1987. *Words in the Mind*. Oxford: Blackwell.

Benczes, Réka. In print. Setting limits on creativity in the production and use of metaphorical and metonymical compounds. In: Sascha Michel and Alexander Onysko (eds.), *Cognitive Approaches to Word Formation*. Berlin and New York: Mouton de Gruyter.

Boers, Frank. 1999. When a bodily source domain becomes prominent. In Ray Gibbs and Gerard Steen (eds.), *Metaphor in Cognitive Linguistics*, 47-56. Amsterdam: John Benjamins.

Boers, Frank and Murielle Demecheleer. 1997. A few metaphorical models in (western) economic discourse. In W. A. Liebert, G. Redeker, and L. Waugh (eds.), *Discourse and Perspective in Cognitive Linguistics,* 115-129. Amsterdam: John Benjamins.

Boers, Frank and Murielle Demecheleer. 2001. Measuring the impact of cross-cultural differences on learners’ comprehension of imageable idioms. *ELT Journal,* 55, 255-262.

Brandt, Line and Per Aage Brandt. 2005. Making sense of a blend. A cognitive semiotic approach to metaphor. *Annual Review of Cognitive Linguistics*, 3. 216-249.

Cameron, Lynne. 2003. *Metaphor in Educational Discourse*. London: Continuum.

Cameron, Lynne. 2007. Patterns of metaphor use in reconciliation talk. *Discourse and Society*, 18, 197-222.

Clausner, Timothy and Croft, William. 1997. Productivity and schematicity in metaphors. *Cognitive Science*, 21(3), 247–282.

Deignan, Alice. 1999. Corpus-based research into metaphor. In Lynne Cameron and Graham Low (eds.), *Researching and Applying Metaphor*, 177-199. Cambridge: Cambridge University Press.

Deignan, Alice. 2003. Metaphorical expressions and culture: An indirect link. *Metaphor and Symbol,* 18(4),255-271.

Deignan, Alice. 2005. *Metaphor and Corpus Linguistics*. Amsterdam: John Benjamins.

Dobrovolskij, Dmitrij and Elisabeth Piirainen. 2005. *Figurative Language. Cross-cultural and Cross-linguistic Perspectives*. Amsterdam: Elsevier.

Fauconnier, Gilles and Mark Turner. 2002. *The Way We Think*. New York: Basic Books.

Feldman, Jerome A. 2006. *From Molecule to Metaphor. A Neural Theory of Language*. Cambridge, Massachusetts/London, England: The MIT Press.

Freeman, Margaret H. 1995. Metaphor making meaning: Dickinson’s conceptual universe. *Journal of Pragmatics*,24: 643–666.

Freeman, Margaret H. 2000. Poetry and the scope of metaphor: Toward a cognitive theory of metaphor. In Antonio Barcelona (ed.), *Metaphor and Metonymy at the Crossroads*, 253–281. Berlin: Mouton de Gruyter.

Freeman, Margaret H. 2007. Cognitive linguistic approaches to literary studies: State of the art in cognitive poetics. In Dirk Geraerts and Hubert Cuyckens (eds.), *The Oxford Handbook of Cognitive Linguistics*, 1175–1202. Oxford: Oxford University Press.

Gevaert, Caroline. 2001. Anger in old and middle english: a ’hot’ topic? *Belgian Essays on Language and Literature*. 89–101.

Gevaert, Caroline. 2005. The anger is heat question: detecting cultural influence on the conceptualization of anger through diachronic corpus analysis. N. Delbacque, J. Van der Auwera, and G. Geeraerts (eds.), *Perspectives on Variation: Sociolinguistic, Historical, Comparative*, 195-208. Berlin: Mouton de Gruyter.

Grady, Joseph. 1997a. *Foundations of Meaning: Primary Metaphors and Primary Scenes*. Doctoral dissertation, University of California at Berkeley.

Grady, Joseph. 1997b. Theories are buildings revisited. *Cognitive Linguistics*, 8, 267-290.

Grady, Joseph. 1999. A typology of motivation for conceptual metaphors. Correlations vs. resemblance. In Ray W. Gibbs and Gerard J. Steen (Eds.) *Metaphor in Cognitive Linguistics*, 79-100. Amsterdam and Philadelphia: John Benjamins.

Guthrie, James R. 1998. *Emily Dickinson’s Vision. Illness and Identity in her Poetry*. Gainesville, FL: The University Press of Florida.

Jackendoff, Ray and David Aaron. 1991. Review Article: *More than cool reason: A field guide to poetic metaphor* by George Lakoff and Mark Johnson. *Language* 67(2): 320–328.

Koller, Veronika. 2004. Metaphor and Gender in Business Media Discourse: a Critical Cognitive Study. Basingstoke and New York: Palgrave.

Kolodny, Annette. 1975. *The Lay of the Land. Metaphor as Experience and History in American Life and Letters.* Chapel Hill: The University of North Carolina Press.

Kolodny, Annette. 1984. *The Land Before Her. Fantasy and Experience of the American Frontiers, 1630-1860.* Chapel Hill: The University of North Carolina Press.

Kövecses, Zoltán. 2000. *American English. An Introduction*. Peterborough, CA: Broadview Press.

Kövecses, Zoltán. 2002. *Metaphor. A Practical Introduction*. Oxford: Oxford University Press.

Kövecses, Zoltán. 2005. *Metaphor in Culture*. *Universality and Variation.* Cambridge: Cambridge University Press.

Kövecses, Zoltán. 2006. *Language, Mind, and Culture. A Practical Introduction*. New York: Oxford University Press.

Kövecses, Zoltán. 2008. Conceptual metaphor theory: some criticisms and some alternative proposals. *Annual Review of Cognitive Linguistics*, 6, 168-184.

Kövecses, Zoltán. 2009a. Metaphor, culture, and discourse: the pressure of coherence. In Andreas Musolff and Jörg Zinken, (eds.), *Metaphor and Discourse*, 11-24. Palgrave Macmillan.

Kövecses, Zoltán. 2009b. The effect of context on the use of metaphor in discourse. *Ibérica* (*Journal of the European Association of Languages for Specific Purposes*), Numero/Number 17, Primavera/Spring, 11-23.

Kövecses, Zoltán. In print. Methodological issues in conceptual metaphor theory. In Hans-Joerg Schmid and Sandra Handl (eds.), *Windows to the Mind. Metaphor, Metonymy, and Conceptual Blending*. Berlin: Mouton de Gruyter.

Kövecses, Zoltán. 2010. *Metaphor. A Practical Introduction.* Second Edition. New York: Oxford University Press.

Köves, Nikoletta. 2002. Hungarian and American dreamworks of life. Term paper. Department of American Studies, Eötvös Loránd University, Budapest.

Lakoff, George. 2008 The neural theory of metaphor. In Ray Gibbs (ed.), *The Cambridge Handbook of Metaphor*. 17-38. New York: Cambridge University Press.

Lakoff, George and Mark Johnson. 1980. *Metaphors We Live By*. Chicago: University of Chicago Press.

Lakoff, George and Mark Johnson. 1999. *Philosophy in the Flesh*. New York: Basic Books.

Lakoff, George and Mark Turner. 1989. *More Than Cool Reason*. Chicago: The University of Chicago Press.

Langacker, Ronald W. 2008. *Cognitve Grammar. A Basic Introduction*. Oxford/New York: Oxford University Press.

Mussolff, Andreas. 2001. Political imagery of Europe: a house without exit doors? *Journal of Multilingual and Multicultural Development* 21:3, 216-229.

Pragglejaz Group. 2007. MIP: A method for identifying metaphorically used words in discourse. *Metaphor and Symbol* 22(1), 1-39.

Rakova, Maria. 2002. The philosophy of embodied realism: A high price to pay? *Cognitive Linguistics* 13–3, 215–244.

Ritchie, David. 2003. “argument is war” – Or is it a game of chess?  Multiple meanings in the analysis of imiplicit metaphors.  *Metaphor and Symbol*, 18(2), 125-146.

Semino, Elena. 2005. The metaphorical construction of complex domains: The case of speech activity in English. *Metaphor and Symbol*, 20–21, 35–70.

Semino, Elena. 2008. *Metaphor in Discourse*. Cambridge: Cambridge University Press.

Sperber, Dan and Deidre Wilson. 2008. A deflationary account of metaphor. In Ray Gibbs (ed.), *The Cambridge Handbook of Metaphor and Thought*, 84-105. New York: Cambridge University Press.

Steen, Gerard. 1999. From linguistic to conceptual metaphor in five steps. In R. Gibbs and G. Steen (eds.). *Metaphor in Cognitive Linguistics*, 57–77. Amsterdam: John Benjamins.

Stefanowitsch, Anatol. 2007. Words and their metaphors. In Anatol Stefanowitch and Stefan Th. Gries (eds.) *Corpus-based Approaches to Metaphor and Metonymy*. 64-105. Berlin: Mouton de Gruyter.

Turner, Mark. 1996. *The Literary Mind*. New York: Oxford University Press.

Zinken, Joerg. 2007. Discourse metaphors: the link between figurative language and habitual analogies. Cognitive Linguistics, 18(3), 445-466.

Yu, Ning. 1998. *The Contemporary Theory of Metaphor: A Perspective from Chinese.* Amsterdam: John Benjamins.

**Literary sources**

Arnold, Matthew

Dover Beach. Retrieved from <http://www.artofeurope.com/arnold/arn1.htm>.

Dickinson, Emily

I reckon – when I count it all –. Retrieved from <http://poetry.poetryx.com/poems/2520/>.

Plath, Sylvia

Medusa. Retrieved from <http://www.americanpoems.com/poets/sylviaplath/1412>.

Sandburg, Carl

Prayers of Steel. Retrieved from <http://www.bartleby.com/134/39.html>.

Skyscraper. Retrieved from <http://www.bartleby.com/165/55.html>.
